# Supplementary material for: Allosteric effects in norbadione A. A clue for the accumulation process of137Cs in mushrooms?
Source: Royal Society of Chemistry journal article supplement (doi:10.1039/b201929a), 2002-01-01
Supplement: b201929a.pdf [file b201929a.pdf]

**Allosteric effects in norbadione A. A clue for the accumulation process  
of  $^{137}\text{Cs}$  in mushrooms?**

**Sandrine Garaudée,<sup>a</sup> Mourad Elhabiri,<sup>a</sup> Daniel Kalny,<sup>a</sup> Céline Robiolle,<sup>b</sup> Jean-Michel  
Trendel,<sup>b</sup> Raymond Hueber,<sup>c</sup> Alain Van Dorsselaer,<sup>c</sup> Pierre Albrecht<sup>\*b</sup> and Anne-Marie  
Albrecht-Gary<sup>\*a</sup>**

<sup>a</sup> *Laboratoire de Physico-Chimie Bioinorganique, UMR 7509 du CNRS, Faculté de Chimie, Université Louis Pasteur (ULP), 67000 Strasbourg, France. E-mail: amalbre@chimie.u-strasbg.fr.*

<sup>b</sup> *Laboratoire de Géochimie Bioorganique, UMR 7509 du CNRS, Faculté de Chimie, ULP, 67000 Strasbourg, France. E-mail: albrecht@chimie.u-strasbg.fr.*

<sup>c</sup> *Laboratoire de Spectrométrie de Masse Bioorganique, UMR 7509 du CNRS, ECPM, ULP, 67200 Strasbourg, France. E-mail: vandors@chimie.u-strasbg.fr.*

*Supplementary Data*

6 pages

**Table S1**  $^1\text{H}$  Chemical shifts (ppm *vs* TMS), multiplicity and coupling constants (Hz) of norbadione A ( $1.47 \times 10^{-2}$  M) solutions as a function of pD. Solvent:  $\text{CD}_3\text{OD}/\text{D}_2\text{O}$  (80/20 by weight),  $T = 25.0(2)^\circ\text{C}$ .

| proton    | pD = 1.0         | pD = 2.1         | pD = 3.4         | pD = 6.4         | pD = 8.5         | pD = 10.0        |
|-----------|------------------|------------------|------------------|------------------|------------------|------------------|
| 3         | 7.51 (s)         | 7.48 (s)         | 7.43<br>(d, 0.9) | 7.41 (s)         | 7.41 (s)         | 7.32 (s)         |
| 5         | 8.98 (s)         | 9.07<br>(d, 0.9) | 9.09<br>(d, 0.9) | 9.11<br>(d, 0.8) | 9.11 (s)         | 9.10 (s)         |
| 7         | 8.93 (s)         | 9.00<br>(d, 0.9) | 9.02<br>(d, 0.9) | 9.04<br>(d, 0.5) | 9.04 (s)         | 9.00 (s)         |
| 8, 8'     | 7.41<br>(d, 8.8) | 7.36<br>(d, 8.7) | 7.29<br>(d, 8.7) | 7.27<br>(d, 8.4) | 7.32 (br)        | 7.56 (br)        |
| 9, 9'     | 6.96<br>(d, 8.5) | 6.95<br>(d, 8.8) | 6.92<br>(d, 9.0) | 6.90<br>(d, 8.8) | 6.91<br>(d, 8.8) | 6.90<br>(d, 8.8) |
| 8'', 8''' | 7.30<br>(d, 8.6) | 7.26<br>(d, 8.7) | 7.22<br>(d, 8.7) | 7.22<br>(d, 8.3) | 7.32 (br)        | 7.56 (br)        |
| 9'', 9''' | 6.93<br>(d, 8.5) | 6.92<br>(d, 8.7) | 6.90<br>(d, 9.0) | 6.88<br>(d, 8.8) | 6.89<br>(d, 9.2) | 6.87<br>(d, 8.9) |

br = broad signal

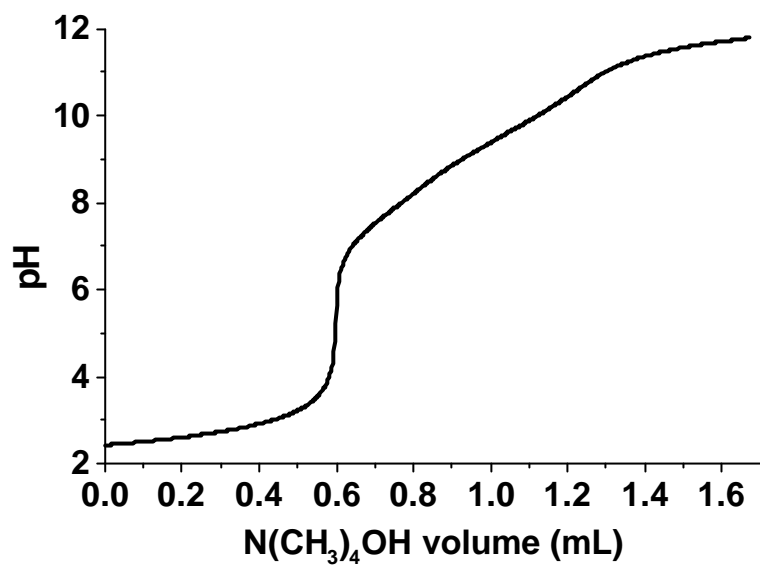

**Figure S1** Potentiometric titration of norbadione A ( $1.50 \times 10^{-3}$  M) by  $\text{N}(\text{CH}_3)_4\text{OH}$  ( $1.03 \times 10^{-1}$  M). Solvent: methanol/water (80/20 by weight);  $T = 25.0(2)$  °C;  $I = 0.1$  M ( $\text{N}(\text{C}_2\text{H}_5)_4\text{ClO}_4$ ).

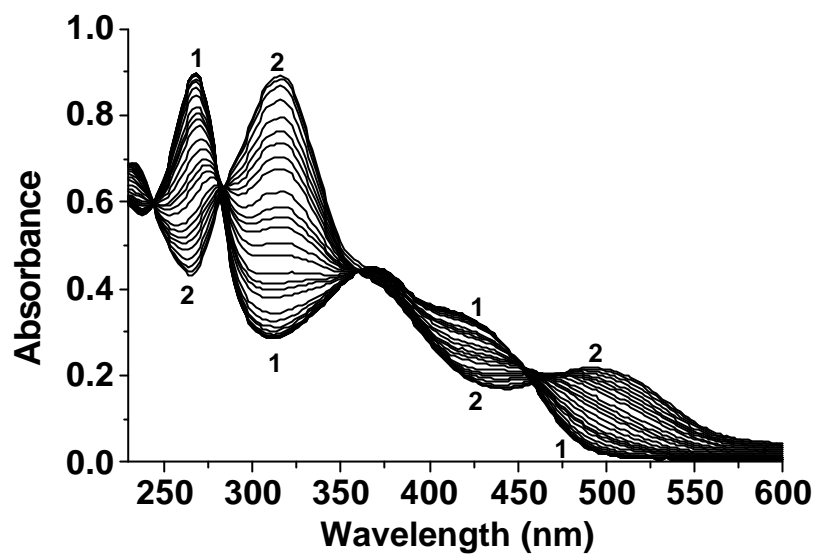

**Figure S2** Absorption spectra of norbadiene A ( $1.90 \times 10^{-5}$  M) as a function of pH. Solvent: methanol/water (80/20 by weight);  $T = 25.0(2)$  °C;  $I = 0.1$  M ( $\text{N}(\text{C}_2\text{H}_5)_4\text{ClO}_4$ );  $l = 1$  cm. Spectra: (1) pH = 4.86; (2) pH = 10.40.

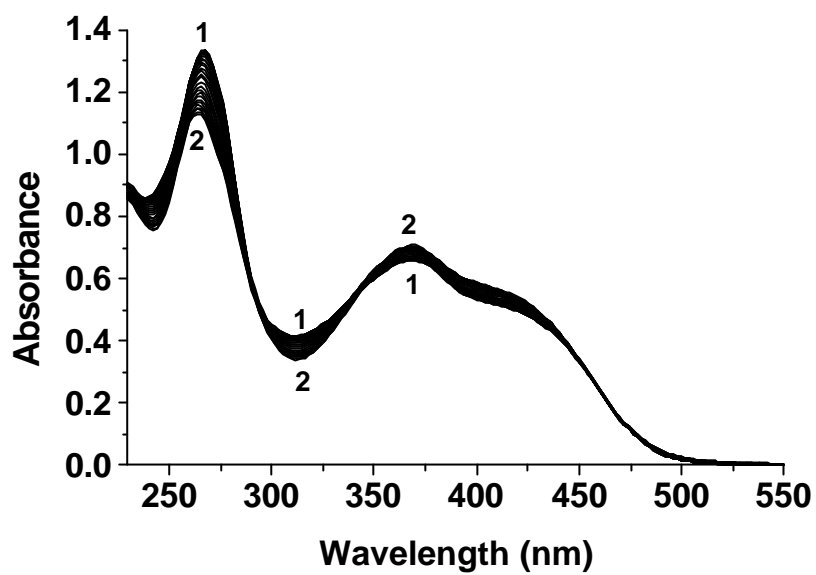

**Figure S3** Absorption spectra of norbadione A ( $2.38 \times 10^{-5}$  M) as a function of pH. Solvent: methanol/water (80/20 by weight);  $T = 25.0(2)$  °C;  $I = 0.1$  M ( $\text{N}(\text{C}_2\text{H}_5)_4\text{ClO}_4$ );  $l = 1$  cm. Spectra: (1) pH = 3.63; (2) pH = 1.05.

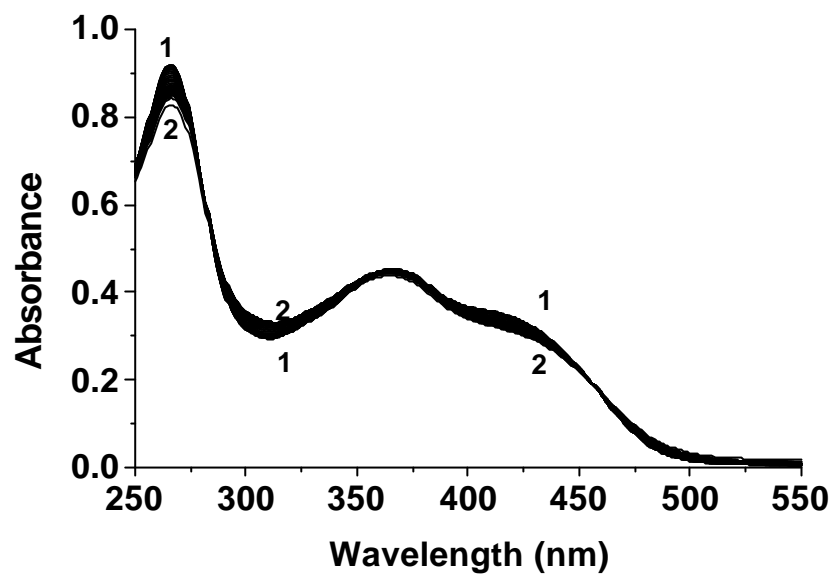

**Figure S4** Spectrophotometric titration of norbadione A ( $9.89 \times 10^{-6}$  M) by caesium. Solvent: methanol/water (80/20 by weight);  $T = 25.0(2)$  °C; 0.1 M succinic acid/TMAOH buffer; pH = 6.1;  $l = 2$  cm; Spectra (1)  $[\text{Cs}^+] = 0$ ; (2)  $[\text{Cs}^+]_{\text{tot}} = 1.02 \times 10^{-4}$  M.
